# Supplementary material
Source: publisher figshare collection journal article supplement (https://acs.figshare.com/ndownloader/files/3803254)
Supplement: Supplementary file 1 [file 3803254]

 
data_AXEL 
  
_audit_creation_method            SHELXL-97 
_chemical_name_systematic 
; 
 ? 
; 
_chemical_name_common             ? 
_chemical_melting_point           ? 
_chemical_formula_moiety          'C4 H2 N8 O4, 2(C2 H3 N5 O2)' 
_chemical_formula_sum 
 'C8 H8 N18 O8' 
_chemical_formula_weight          484.32 
  
loop_ 
 _atom_type_symbol 
 _atom_type_description 
 _atom_type_scat_dispersion_real 
 _atom_type_scat_dispersion_imag 
 _atom_type_scat_source 
 'C'  'C'   0.0181   0.0091 
 'International Tables Vol C Tables 4.2.6.8 and 6.1.1.4' 
 'H'  'H'   0.0000   0.0000 
 'International Tables Vol C Tables 4.2.6.8 and 6.1.1.4' 
 'N'  'N'   0.0311   0.0180 
 'International Tables Vol C Tables 4.2.6.8 and 6.1.1.4' 
 'O'  'O'   0.0492   0.0322 
 'International Tables Vol C Tables 4.2.6.8 and 6.1.1.4' 
  
_symmetry_cell_setting            triclinic 
_symmetry_space_group_name_H-M    'P -1' 
  
loop_ 
 _symmetry_equiv_pos_as_xyz 
 'x, y, z' 
 '-x, -y, -z' 
  
_cell_length_a                    7.5387(2) 
_cell_length_b                    7.8716(2) 
_cell_length_c                    7.9743(6) 
_cell_angle_alpha                 75.469(5) 
_cell_angle_beta                  76.759(5) 
_cell_angle_gamma                 73.514(5) 
_cell_volume                      432.84(4) 
_cell_formula_units_Z             1 
_cell_measurement_temperature     85(2) 
_cell_measurement_reflns_used     5543 
_cell_measurement_theta_min       7.50 
_cell_measurement_theta_max       68.10 
  
_exptl_crystal_description        prism 
_exptl_crystal_colour             colorless 
_exptl_crystal_size_max           0.06 
_exptl_crystal_size_mid           0.04 
_exptl_crystal_size_min           0.01 
_exptl_crystal_density_meas       ? 
_exptl_crystal_density_diffrn     1.858 
_exptl_crystal_density_method     'not measured' 
_exptl_crystal_F_000              246 
_exptl_absorpt_coefficient_mu     1.449 
_exptl_absorpt_correction_type    multi-scan 
_exptl_absorpt_correction_T_min   0.9181 
_exptl_absorpt_correction_T_max   0.9857 
_exptl_absorpt_process_details 
; 
    Higashi, T. (1995). Program for Absorption Correction. 
    Rigaku Corporation, Tokyo, Japan. 
; 
  
  
_exptl_special_details 
; 
 3880 images x 15 sec / 60 sec @ 42.00 mm; 1.0 deg omega scans; 40kV/30mA 
; 
  
_diffrn_ambient_temperature       85(2) 
_diffrn_radiation_wavelength      1.54178 
_diffrn_radiation_type            CuK\a 
_diffrn_radiation_source          'micro-focus rotating anode' 
_diffrn_radiation_monochromator   confocal 
_diffrn_measurement_device_type   'Rigaku Saturn70 CCD' 
_diffrn_measurement_method        \w 
_diffrn_detector_area_resol_mean  29.257 
_diffrn_reflns_number             11930 
_diffrn_reflns_av_R_equivalents   0.0445 
_diffrn_reflns_av_sigmaI/netI     0.0261 
_diffrn_reflns_limit_h_min        -9 
_diffrn_reflns_limit_h_max        9 
_diffrn_reflns_limit_k_min        -9 
_diffrn_reflns_limit_k_max        9 
_diffrn_reflns_limit_l_min        -9 
_diffrn_reflns_limit_l_max        9 
_diffrn_reflns_theta_min          7.48 
_diffrn_reflns_theta_max          68.18 
_reflns_number_total              1556 
_reflns_number_gt                 1359 
_reflns_threshold_expression      >2sigma(I) 
  
  
_computing_data_collection        'CrystalClear-SM Expert 2.0 r12 (Rigaku, 2011)' 
_computing_cell_refinement        'CrystalClear-SM Expert 2.0 r12' 
_computing_data_reduction         'CrystalClear-SM Expert 2.0 r12' 
_computing_structure_solution     'SHELXS-97 (Sheldrick, 1990)' 
_computing_structure_refinement   'SHELXL-97 (Sheldrick, 1997)' 
_computing_molecular_graphics     'Bruker SHELXTL' 
_computing_publication_material   'Bruker SHELXTL' 
  
_refine_special_details 
; 
 Refinement of F^2^ against ALL reflections.  The weighted R-factor wR and 
 goodness of fit S are based on F^2^, conventional R-factors R are based 
 on F, with F set to zero for negative F^2^. The threshold expression of 
 F^2^ > 2sigma(F^2^) is used only for calculating R-factors(gt) etc. and is 
 not relevant to the choice of reflections for refinement.  R-factors based 
 on F^2^ are statistically about twice as large as those based on F, and R- 
 factors based on ALL data will be even larger. 
; 
  
_refine_ls_structure_factor_coef  Fsqd 
_refine_ls_matrix_type            full 
_refine_ls_weighting_scheme       calc 
_refine_ls_weighting_details 
 'calc w=1/[\s^2^(Fo^2^)+(0.0776P)^2^+0.0758P] where P=(Fo^2^+2Fc^2^)/3' 
_atom_sites_solution_primary      direct 
_atom_sites_solution_secondary    difmap 
_atom_sites_solution_hydrogens    geom 
_refine_ls_hydrogen_treatment     mixed 
_refine_ls_extinction_method      none 
_refine_ls_extinction_coef        ? 
_refine_ls_number_reflns          1556 
_refine_ls_number_parameters      170 
_refine_ls_number_restraints      0 
_refine_ls_R_factor_all           0.0438 
_refine_ls_R_factor_gt            0.0397 
_refine_ls_wR_factor_ref          0.1177 
_refine_ls_wR_factor_gt           0.1123 
_refine_ls_goodness_of_fit_ref    1.116 
_refine_ls_restrained_S_all       1.116 
_refine_ls_shift/su_max           0.000 
_refine_ls_shift/su_mean          0.000 
  
loop_ 
 _atom_site_label 
 _atom_site_type_symbol 
 _atom_site_fract_x 
 _atom_site_fract_y 
 _atom_site_fract_z 
 _atom_site_U_iso_or_equiv 
 _atom_site_adp_type 
 _atom_site_occupancy 
 _atom_site_symmetry_multiplicity 
 _atom_site_calc_flag 
 _atom_site_refinement_flags 
 _atom_site_disorder_assembly 
 _atom_site_disorder_group 
C1 C 0.6412(2) 0.7327(2) 0.1408(2) 0.0192(4) Uani 1 1 d . . . 
C2 C 0.7312(2) 0.6030(2) -0.0718(2) 0.0188(4) Uani 1 1 d . . . 
C3 C -0.1069(2) 1.1722(2) 0.2825(2) 0.0179(4) Uani 1 1 d . . . 
C4 C -0.0102(2) 1.0361(2) 0.0776(2) 0.0170(4) Uani 1 1 d . . . 
O1 O 0.77826(19) 0.73265(18) 0.36863(19) 0.0305(4) Uani 1 1 d . . . 
O2 O 0.50175(18) 0.91272(16) 0.34314(18) 0.0275(4) Uani 1 1 d . . . 
O3 O -0.39309(17) 1.35644(16) 0.36466(17) 0.0240(3) Uani 1 1 d . . . 
O4 O -0.17167(19) 1.31433(17) 0.51638(18) 0.0264(4) Uani 1 1 d . . . 
N1 N 0.6397(2) 0.7971(2) 0.2962(2) 0.0231(4) Uani 1 1 d . . . 
N2 N 0.4919(2) 0.78740(18) 0.0665(2) 0.0203(4) Uani 1 1 d . . . 
N3 N 0.5512(2) 0.70111(19) -0.0728(2) 0.0213(4) Uani 1 1 d . . . 
H3A H 0.479(4) 0.715(3) -0.148(3) 0.039(7) Uiso 1 1 d . . . 
N4 N 0.7928(2) 0.62093(19) 0.0663(2) 0.0202(4) Uani 1 1 d . . . 
N5 N 0.8280(2) 0.5004(2) -0.1895(2) 0.0239(4) Uani 1 1 d . . . 
H5B H 0.951(4) 0.448(3) -0.183(3) 0.034(6) Uiso 1 1 d . . . 
H5A H 0.785(4) 0.520(4) -0.283(4) 0.058(9) Uiso 1 1 d . . . 
N6 N -0.2323(2) 1.28887(19) 0.3975(2) 0.0205(4) Uani 1 1 d . . . 
N7 N -0.1658(2) 1.14384(18) 0.14748(19) 0.0186(4) Uani 1 1 d . . . 
N8 N 0.1284(2) 1.00427(19) 0.16986(19) 0.0179(4) Uani 1 1 d . . . 
H8A H 0.257(4) 0.927(4) 0.146(4) 0.050(7) Uiso 1 1 d . . . 
N9 N 0.0683(2) 1.09296(19) 0.3056(2) 0.0199(4) Uani 1 1 d . . . 
  
loop_ 
 _atom_site_aniso_label 
 _atom_site_aniso_U_11 
 _atom_site_aniso_U_22 
 _atom_site_aniso_U_33 
 _atom_site_aniso_U_23 
 _atom_site_aniso_U_13 
 _atom_site_aniso_U_12 
C1 0.0162(9) 0.0182(8) 0.0226(9) -0.0051(7) -0.0035(7) -0.0018(7) 
C2 0.0143(8) 0.0180(8) 0.0245(10) -0.0040(7) -0.0055(7) -0.0029(6) 
C3 0.0166(9) 0.0173(8) 0.0189(9) -0.0056(7) -0.0028(7) -0.0009(7) 
C4 0.0138(8) 0.0169(8) 0.0193(9) -0.0036(6) -0.0042(7) -0.0011(6) 
O1 0.0234(7) 0.0379(8) 0.0325(8) -0.0119(6) -0.0135(6) 0.0002(6) 
O2 0.0227(7) 0.0256(7) 0.0317(8) -0.0120(6) -0.0015(6) 0.0012(5) 
O3 0.0159(6) 0.0255(7) 0.0274(7) -0.0066(5) -0.0047(5) 0.0019(5) 
O4 0.0288(8) 0.0264(7) 0.0260(7) -0.0107(5) -0.0092(6) -0.0013(6) 
N1 0.0186(8) 0.0233(8) 0.0272(9) -0.0062(6) -0.0048(6) -0.0030(6) 
N2 0.0158(8) 0.0195(7) 0.0258(8) -0.0069(6) -0.0054(6) -0.0007(6) 
N3 0.0157(8) 0.0220(8) 0.0258(9) -0.0064(6) -0.0070(7) 0.0005(6) 
N4 0.0150(8) 0.0201(7) 0.0241(8) -0.0052(6) -0.0041(6) -0.0006(6) 
N5 0.0179(8) 0.0259(8) 0.0265(9) -0.0092(7) -0.0056(7) 0.0019(6) 
N6 0.0195(8) 0.0189(7) 0.0214(8) -0.0052(6) -0.0033(6) -0.0013(6) 
N7 0.0156(7) 0.0182(7) 0.0201(8) -0.0034(6) -0.0042(6) -0.0008(6) 
N8 0.0154(7) 0.0193(7) 0.0186(8) -0.0052(6) -0.0056(6) -0.0001(6) 
N9 0.0173(7) 0.0193(7) 0.0223(8) -0.0057(6) -0.0046(6) -0.0005(6) 
  
_geom_special_details 
; 
 All esds (except the esd in the dihedral angle between two l.s. planes) 
 are estimated using the full covariance matrix.  The cell esds are taken 
 into account individually in the estimation of esds in distances, angles 
 and torsion angles; correlations between esds in cell parameters are only 
 used when they are defined by crystal symmetry.  An approximate (isotropic) 
 treatment of cell esds is used for estimating esds involving l.s. planes. 
; 
  
loop_ 
 _geom_bond_atom_site_label_1 
 _geom_bond_atom_site_label_2 
 _geom_bond_distance 
 _geom_bond_site_symmetry_2 
 _geom_bond_publ_flag 
C1 N2 1.306(2) . ? 
C1 N4 1.346(2) . ? 
C1 N1 1.449(3) . ? 
C2 N5 1.340(2) . ? 
C2 N4 1.341(3) . ? 
C2 N3 1.358(2) . ? 
C3 N9 1.324(2) . ? 
C3 N7 1.342(2) . ? 
C3 N6 1.454(2) . ? 
C4 N7 1.333(2) . ? 
C4 N8 1.344(2) . ? 
C4 C4 1.448(4) 2_575 ? 
O1 N1 1.229(2) . ? 
O2 N1 1.2271(19) . ? 
O3 N6 1.237(2) . ? 
O4 N6 1.222(2) . ? 
N2 N3 1.369(2) . ? 
N3 H3A 0.86(3) . ? 
N5 H5B 0.91(3) . ? 
N5 H5A 0.84(3) . ? 
N8 N9 1.356(2) . ? 
N8 H8A 0.99(3) . ? 
  
loop_ 
 _geom_angle_atom_site_label_1 
 _geom_angle_atom_site_label_2 
 _geom_angle_atom_site_label_3 
 _geom_angle 
 _geom_angle_site_symmetry_1 
 _geom_angle_site_symmetry_3 
 _geom_angle_publ_flag 
N2 C1 N4 118.08(17) . . ? 
N2 C1 N1 119.29(15) . . ? 
N4 C1 N1 122.62(16) . . ? 
N5 C2 N4 126.06(17) . . ? 
N5 C2 N3 124.31(19) . . ? 
N4 C2 N3 109.61(16) . . ? 
N9 C3 N7 118.11(15) . . ? 
N9 C3 N6 121.45(17) . . ? 
N7 C3 N6 120.43(16) . . ? 
N7 C4 N8 110.79(16) . . ? 
N7 C4 C4 125.3(2) . 2_575 ? 
N8 C4 C4 123.88(19) . 2_575 ? 
O2 N1 O1 125.51(17) . . ? 
O2 N1 C1 117.44(15) . . ? 
O1 N1 C1 117.04(15) . . ? 
C1 N2 N3 100.96(14) . . ? 
C2 N3 N2 109.93(16) . . ? 
C2 N3 H3A 128.8(17) . . ? 
N2 N3 H3A 121.3(17) . . ? 
C2 N4 C1 101.43(14) . . ? 
C2 N5 H5B 117.4(15) . . ? 
C2 N5 H5A 117(2) . . ? 
H5B N5 H5A 122(2) . . ? 
O4 N6 O3 125.29(15) . . ? 
O4 N6 C3 118.29(15) . . ? 
O3 N6 C3 116.41(16) . . ? 
C4 N7 C3 100.57(14) . . ? 
C4 N8 N9 110.24(14) . . ? 
C4 N8 H8A 126.8(16) . . ? 
N9 N8 H8A 123.0(16) . . ? 
C3 N9 N8 100.29(15) . . ? 
  
loop_ 
 _geom_torsion_atom_site_label_1 
 _geom_torsion_atom_site_label_2 
 _geom_torsion_atom_site_label_3 
 _geom_torsion_atom_site_label_4 
 _geom_torsion 
 _geom_torsion_site_symmetry_1 
 _geom_torsion_site_symmetry_2 
 _geom_torsion_site_symmetry_3 
 _geom_torsion_site_symmetry_4 
 _geom_torsion_publ_flag 
N2 C1 N1 O2 -5.7(2) . . . . ? 
N4 C1 N1 O2 172.69(14) . . . . ? 
N2 C1 N1 O1 175.14(15) . . . . ? 
N4 C1 N1 O1 -6.5(2) . . . . ? 
N4 C1 N2 N3 0.35(19) . . . . ? 
N1 C1 N2 N3 178.81(14) . . . . ? 
N5 C2 N3 N2 178.66(16) . . . . ? 
N4 C2 N3 N2 0.49(19) . . . . ? 
C1 N2 N3 C2 -0.49(17) . . . . ? 
N5 C2 N4 C1 -178.38(16) . . . . ? 
N3 C2 N4 C1 -0.26(17) . . . . ? 
N2 C1 N4 C2 -0.07(19) . . . . ? 
N1 C1 N4 C2 -178.47(14) . . . . ? 
N9 C3 N6 O4 0.8(2) . . . . ? 
N7 C3 N6 O4 -178.31(13) . . . . ? 
N9 C3 N6 O3 179.93(14) . . . . ? 
N7 C3 N6 O3 0.9(2) . . . . ? 
N8 C4 N7 C3 0.56(17) . . . . ? 
C4 C4 N7 C3 -178.7(2) 2_575 . . . ? 
N9 C3 N7 C4 -0.44(19) . . . . ? 
N6 C3 N7 C4 178.67(14) . . . . ? 
N7 C4 N8 N9 -0.54(18) . . . . ? 
C4 C4 N8 N9 178.72(19) 2_575 . . . ? 
N7 C3 N9 N8 0.13(18) . . . . ? 
N6 C3 N9 N8 -178.96(14) . . . . ? 
C4 N8 N9 C3 0.24(16) . . . . ? 
  
loop_ 
 _geom_hbond_atom_site_label_D 
 _geom_hbond_atom_site_label_H 
 _geom_hbond_atom_site_label_A 
 _geom_hbond_distance_DH 
 _geom_hbond_distance_HA 
 _geom_hbond_distance_DA 
 _geom_hbond_angle_DHA 
 _geom_hbond_site_symmetry_A 
N3 H3A O3  0.86(3) 2.22(3) 3.025(2) 154(2) 2_575 
N3 H3A N7  0.86(3) 2.31(3) 2.950(2) 131(2) 2_575 
N5 H5B O1  0.91(3) 2.53(2) 3.240(2) 135(2) 2_765 
N5 H5A O4  0.84(3) 2.46(3) 3.061(2) 129(3) 1_644 
N8 H8A N2  0.99(3) 1.87(3) 2.850(2) 171(2) . 
  
_diffrn_measured_fraction_theta_max    0.982 
_diffrn_reflns_theta_full              68.18 
_diffrn_measured_fraction_theta_full   0.982 
_refine_diff_density_max    0.248 
_refine_diff_density_min   -0.278 
_refine_diff_density_rms    0.065 
